# Supplementary material for: Qualitative study of challenges with recruitment of hospitals into a cluster controlled trial of clinical decision support in Australia
Source: HighWire-hosted journal article supplement (doi:10.1136/bmjopen-2023-080610), 2024-03-01
Supplement: bmjopen-2023-080610supp001_data_supplement.pdf [file bmjopen-2023-080610supp001_data_supplement.pdf]

Appendix 1. Setting details

| Hospital type*       | State | Beds (approx.) | Remoteness     |
|----------------------|-------|----------------|----------------|
| Principal referral   | NSW   | 700            | Major city     |
| Public acute Group A | NSW   | 450            | Major city     |
| Principal referral   | NSW   | 550            | Major city     |
| Public acute Group A | NSW   | 300            | Inner regional |
| Public acute Group A | NSW   | 250            | Inner regional |
| Principal referral   | QLD   | 1000           | Major city     |

\*Principal referral hospitals provide a very broad range of services, have a range of highly specialised service units and very large patient volumes. Public acute Group A hospitals do not provide the breadth of services of a principal referral hospital but include 24-hour emergency, an intensive care unit, coronary care and oncology unit.<sup>33</sup>

Appendix 2. Interview guide

1. How did you hear about our study being run on drug-drug interaction alerts?
2. Do you know how and why your hospital decided to participate in the study? For example, who was consulted, what factors were taken into consideration?

3. What were your initial impressions of the study? Have these changed over time, after learning more about the study? If yes, why?
4. What do you think were the main barriers or challenges to recruiting hospitals into this study? What about trials of digital interventions more broadly?
5. What about facilitators? Can you think of anything that would have facilitated participation of hospitals in this study?
6. Can you describe the main risks and benefits of the research study?
